# Supplementary material for: Development and internal validation of a machine learning–based prediction model and simplified screening score for in-hospital falls: a retrospective cohort study
Source: Research Square preprint supplement (doi:10.21203/rs.3.rs-8540709/v1), 2026-01-23
Supplement: Supplementary file 1 [file d8ef96177d4f954bd0673b15.docx]

**Additional File**

**Supplementary Table S1** Proportion of missing values for each predictor before imputation

| **Variable** | **Missing (*n*)** | **Missing (%)** |
| --- | --- | --- |
| Male | 1 | 0.16% |
| Age | 0 | 0.00% |
| Motor FIM score | 11 | 1.80% |
| Cognitive FIM score | 11 | 1.80% |
| Smoking index | 0 | 0.00% |
| ALB | 208 | 34.0% |
| BNP | 461 | 75.5% |
| CRP | 221 | 36.2% |
| PT-INR | 488 | 79.9% |
| T-Bil | 249 | 40.8% |
| T-CHO | 419 | 68.6% |
| CRE | 150 | 24.5% |
| eGFR | 305 | 49.9% |
| γ-GTP | 272 | 44.5% |
| FBG | 467 | 76.5% |
| Hgb | 161 | 26.4% |
| Antihypertensive agents | 0 | 0 |
| Antidiabetic agents | 0 | 0 |
| Sedative–hypnotic agents | 0 | 0 |
| BMI | (Not available) | (Not available) |
| Height | 10 | 1.64% |
| Weight | 9 | 1.47% |

FIM, Functional Independence Measure; ALB, serum albumin; BNP, B-type natriuretic peptide; CRP, C-reactive protein, PT-INR, prothrombin time–international normalised ratio, T-Bil, total bilirubin; T-CHO, total cholesterol; CRE, creatinine; eGFR, estimated glomerular filtration rate; γ-GTP, γ-glutamyl transpeptidase; FBG, fasting blood glucose; Hgb, haemoglobin; BMI, body mass index

**Supplementary Table S2** Variance inflation factors (VIFs) with and without height and weight

| **Item** | **VIF with height and weight** | **VIF without height and weight** |
| --- | --- | --- |
| Male | 2.291062 | 1.337 |
| Age | 1.752678 | 1.482 |
| Motor FIM score | 2.244764 | 2.227 |
| Cognitive FIM score | 2.242398 | 2.237 |
| Smoking | 1.061306 | 1.057 |
| ALB | 1.812880 | 1.794 |
| BNP | 1.130897 | 1.129 |
| CRP | 1.194490 | 1.193 |
| PT-INR | 1.068827 | 1.067 |
| T-Bil | 1.095273 | 1.093 |
| T-CHO | 1.130917 | 1.212 |
| CRE | 1.207732 | 1.203 |
| eGFR | 1.279926 | 1.278 |
| γ-GTP | 1.073617 | 1.068 |
| FBG | 1.088699 | 1.088 |
| Hgb | 1.673181 | 1.664 |
| Antihypertensive agents | 1.053904 | 1.050 |
| Antidiabetic agents | 1.140448 | 1.139 |
| Sedative–hypnotic agents | 1.075689 | 1.070 |
| BMI | 54.229632 | 1.229 |
| Height | 30.095709 | (Not available) |
| Weight | 89.406513 | (Not available) |

FIM, Functional Independence Measure; ALB, serum albumin; BNP, B-type natriuretic peptide; CRP, C-reactive protein, PT-INR, prothrombin time–international normalised ratio, T-Bil, total bilirubin; T-CHO, total cholesterol; CRE, creatinine; eGFR, estimated glomerular filtration rate; γ-GTP, γ-glutamyl transpeptidase; FBG, fasting blood glucose; Hgb, haemoglobin
